# Supplementary material for: Single-molecule analysis of specificity and multivalency in binding of short linear substrate motifs to the APC/C
Source: PubMed Central journal article supplement (PMC8764033; doi:10.1038/s41467-022-28031-2), 2022-01-17
Supplement: 41467_2022_28031_MOESM3_ESM.pdf [file 41467_2022_28031_MOESM3_ESM.pdf]

### Description of Additional Supplementary Files

File Name: Supplementary Movie 1

Description: Movie of Cy5-labeled Hsl1 D box peptide binding to Cdh1<sup>WD40</sup> (see Fig. 2c). The movie was made using a 100 ms imaging interval at 10 fps (real time) for 100 frames.

File Name: Supplementary Movie 2

Description: Movie of Cy5-labeled Hsl1 D box mutant peptide binding to Cdh1<sup>WD40</sup> (see Fig. 2d). The movie was made using a 100 ms imaging interval at 10 fps (real time) for 100 frames.

File Name: Supplementary Movie 3

Description: Movie of Cy5-labeled Hsl1 D box peptide binding to APC/C<sup>apo</sup> (see Fig. 2e). The movie was made using a 32 ms imaging interval at 10 fps (real time) for 100 frames.

File Name: Supplementary Movie 4

Description: Movie of Cy5-labeled Hsl1 D box peptide binding to APC/C<sup>Cdh1</sup> (see Fig. 2f). The movie was made using a 5 s imaging interval at 10 fps (real time) for 100 frames.

File Name: Supplementary Movie 5

Description: Movie of Cy5-labeled Hsl1 D box peptide binding to APC/C<sup>Cdc20</sup> (see Fig. 2g). The movie was made using a 60 ms imaging interval at 10 fps (real time) for 100 frames.
